# Supplementary material for: Two chiral haloplumbate hybrids with thermochromism luminescence and application potential as luminescent thermometers
Source: Royal Society of Chemistry journal article supplement (doi:10.1039/d0dt02261f), 2020-01-01
Supplement: d0dt02261f1.pdf [file d0dt02261f1.pdf]

# **Two chiral haloplumbate hybrids with thermochromism luminescence and application as luminescent thermometers**

Shan-Shan Yu,<sup>a</sup> Hai-Rong Zhao,<sup>a</sup> Hui Zhang\*<sup>a</sup> and Hai-Bao Duan\*<sup>a,b</sup>

<sup>a</sup>Key laboratory of Advanced Functional Materials of Nanjing, Nanjing Xiaozhuang University, Nanjing 211171, P. R. China

<sup>b</sup>Department of Chemistry and Biochemistry, University of California, Los Angeles, California 90095-1569, United States

E-mail: [duanhaibao4660@163.com](mailto:duanhaibao4660@163.com)

## 1. Experimental

### 1.1. Chemicals and reagents

The reagents and solvents were purchased from commercial sources and used without further purification.

### 1.2. Physical measurements

Thermogravimetric (TG) experiment was performed with a TA2000/2960 thermogravimetric analyzer from 30 to 800°C at a warming rate of 10 K/min under nitrogen and air atmosphere, and the polycrystalline samples were placed in an aluminum crucible. Powder X-ray diffraction (PXRD) data for the as-prepared was collected using Bruker D8 Advance powder diffractometer operating at 40 kV and 40 mA with Cu K radiation  $\lambda = 1.5418 \text{ \AA}$  at ambient temperature. UV-visible-NIR absorption spectra were taken in the solid state by diffuse reflection method using an integrating sphere of PerkinElmer Lambda 950 spectrometer. Solid state fluorescence spectra were recorded on a Fluorolog Tau-3 Fluorometer for the powdered crystalline sample at selected temperatures. The integration intervals used to calculate the intensities of HE-LE bands and intensity ratios is 350-470 nm for HE bands and 470-820 nm for LE bands, respectively. The temperature sensitivities have been obtained by fitted the linear function in the selected temperature range.

**X-ray crystallography.** Selected crystals of **1** and **2** at room temperature and 100 K were centered on an Oxford Diffraction Xcalibur diffractometer equipped with a Sapphire 3 CCD detector and a graphite monochromated Mo K $\alpha$  ( $\lambda = 0.71073 \text{ \AA}$ ). The data collection routine, unit cell refinement, and data processing were carried out with the program CrysAlis.<sup>1</sup> Structures were solved by the direct method and refined by the full-matrix least-squares procedure on F<sup>2</sup> using SHELXL-97 program.<sup>2</sup> The non-Hydrogen atoms were anisotropically refined using the full-matrix least-squares method on F<sup>2</sup>.

### 1.3. Preparations for **1**

[C<sub>6</sub>H<sub>10</sub>(NH<sub>3</sub>)<sub>2</sub>][PbCl<sub>4</sub>] (**1**): The hybrid crystals were achieved using the process

below:  $\text{PbCl}_2$  (0.5 mmol) was dissolved in 3 ml of 10 % HCl and were stirred for 3h, then 0.5 mmol (*R*)-cyclohexane-1,2-diamine was added and stirred another 1h. The solution was filtered, white needle-shape crystals were obtained in solution. The crystal was washed with DMF and acetone and dried in air. The yield is ca. 70% . Anal. Calcd for **1**: C, 15.49; H, 3.46; N, 6.02. Found: C, 15.60; H, 3.55; N, 5.90.

$[\text{C}_6\text{H}_{10}(\text{NH}_3)_2][\text{PbBr}_4]$  (**2**): The crystals of **2** were achieved using a similar process to that for **1**, and the difference in the preparation process concerns only replacing the reactant  $\text{PbBr}_2$  with  $\text{PbCl}_2$  and HBr with HCl. The yield is ca. 70% . Anal. Calcd for **2**: C, 11.20; H, 2.51; N, 4.26. Found: C, 11.52; H, 2.45; N, 4.38.

### References:

1. *CrysAlis VI.171*, Oxford Diffraction Ltd., Poland, 2004.
2. G. M. Sheldrick, *SHELXL-97*, Program for the Refinement of Crystal structure, University of Göttingen, Germany, 1997.

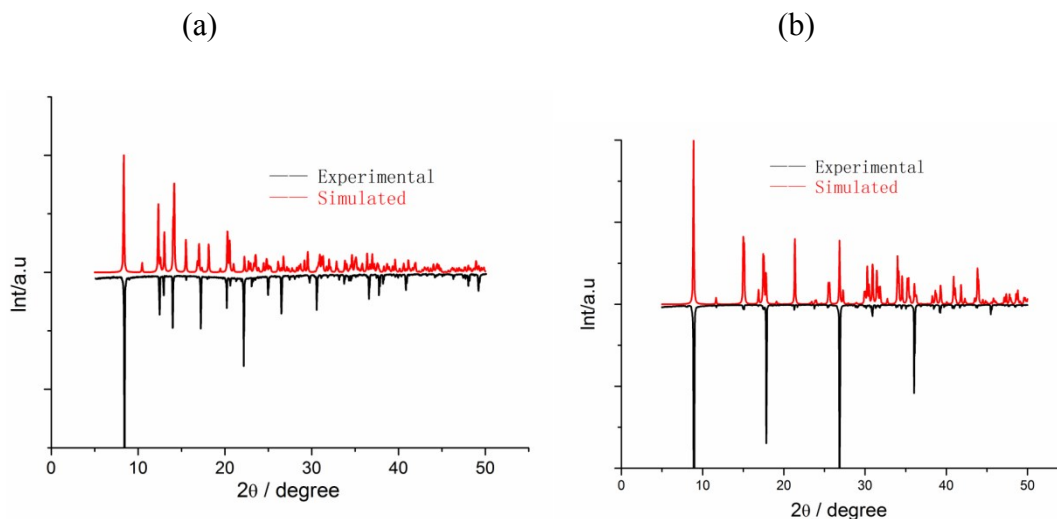

**Figure S1** Powder X-ray diffraction patterns for as-prepared sample of ( a) **1** and (b) **2** confirming the phase purity of the as-prepared sample (Black lines: experimental patterns; red lines: simulated profiles).

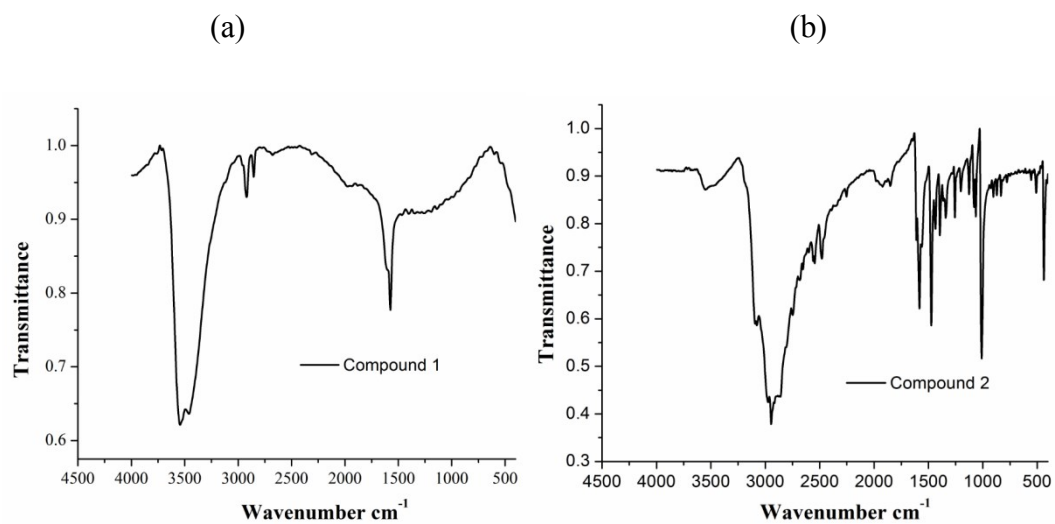

Figure S2 IR spectra of (a) 1 and (b) 2

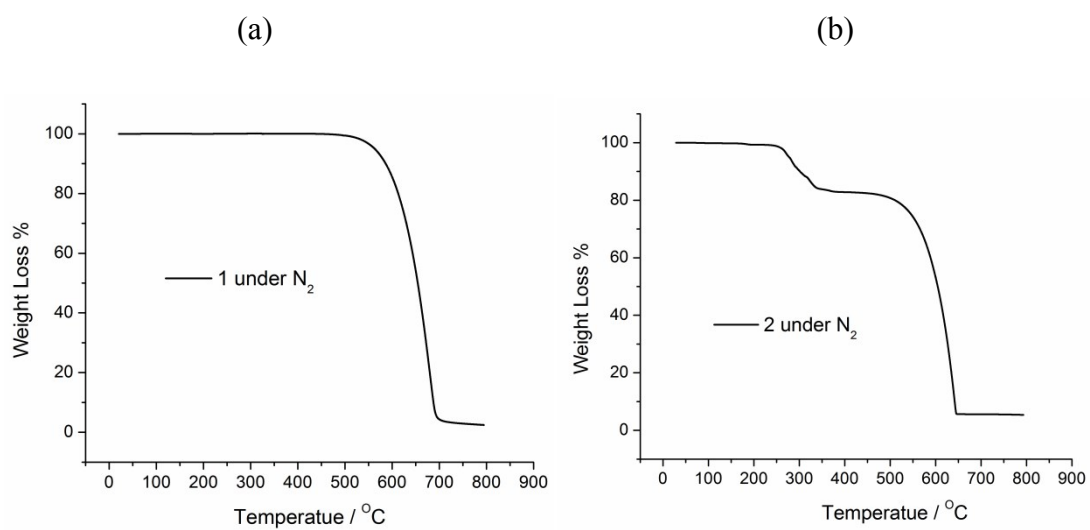

Figure S3 TG plot under  $\text{N}_2$  atmosphere for (a) 1 and (b) 2

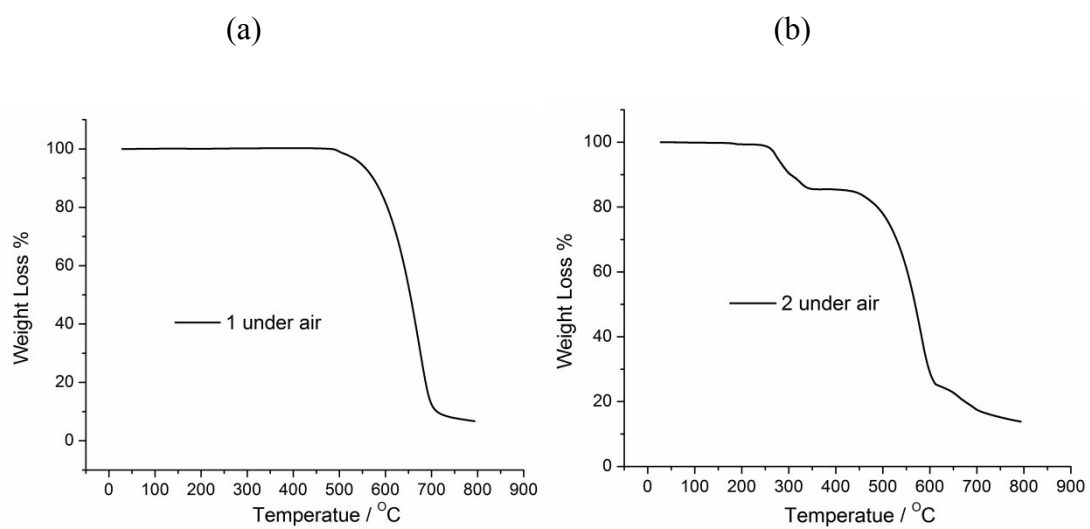

Figure S4 TG plot under air atmosphere for (a) 1 and (b) 2

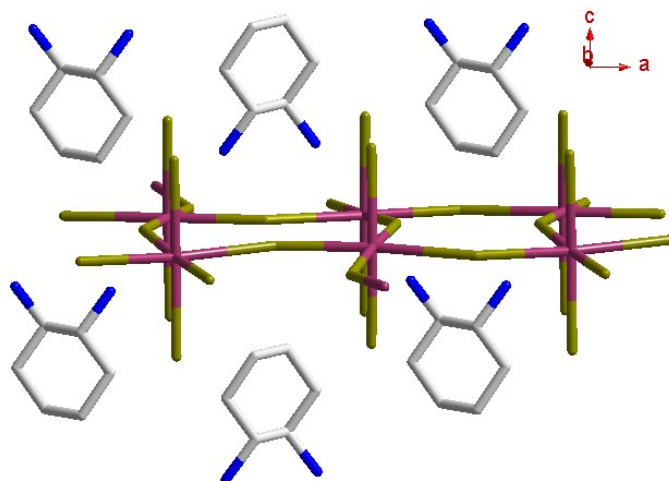

Figure S5 The layer packing structure of **2** along the *b*-axis

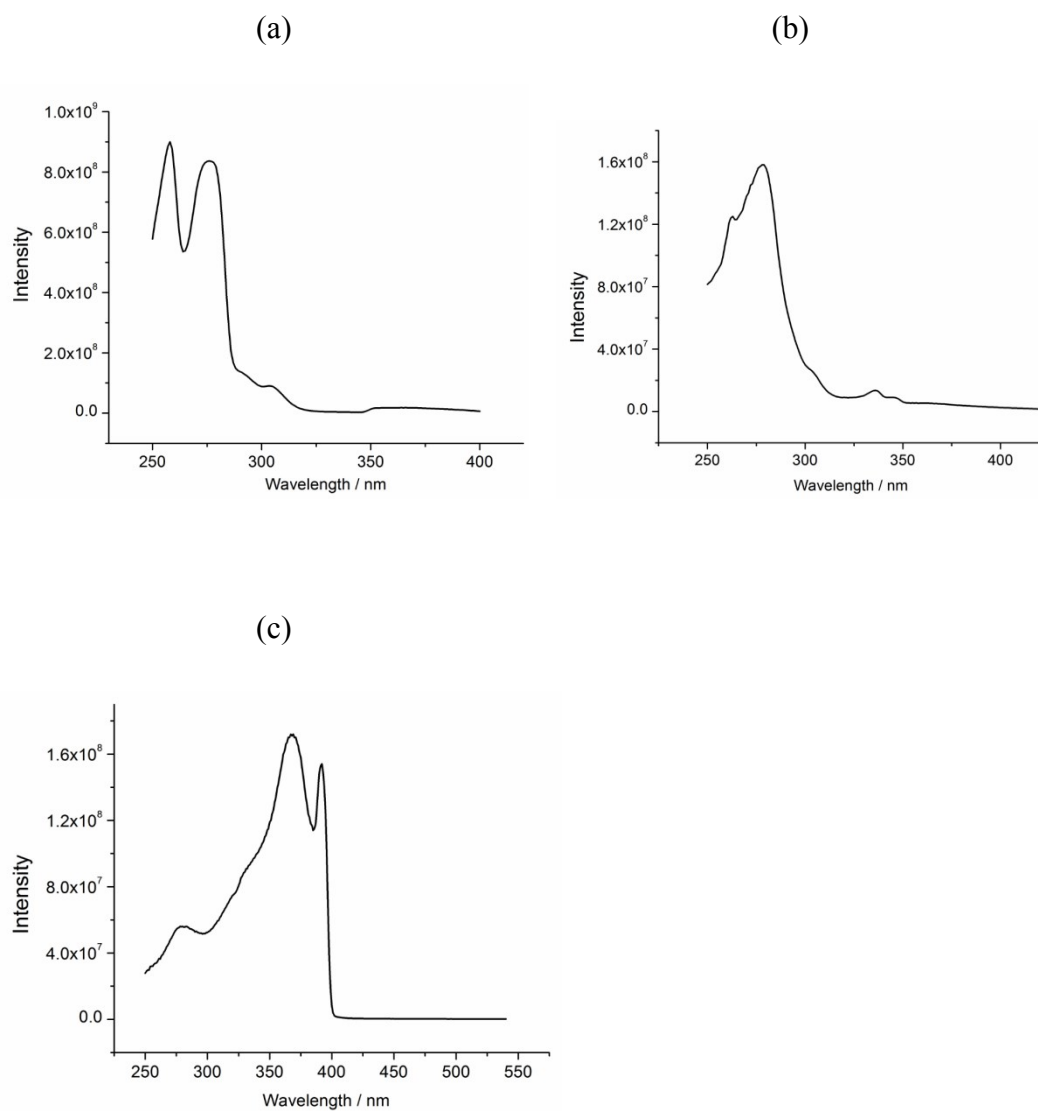

Figure S6 Excitation spectra of **1** at 100 K for monitoring (a) high energy (HE) emission band; (b) low energy (LE) emission band and (c) excitation spectra of **2** at 100 K.

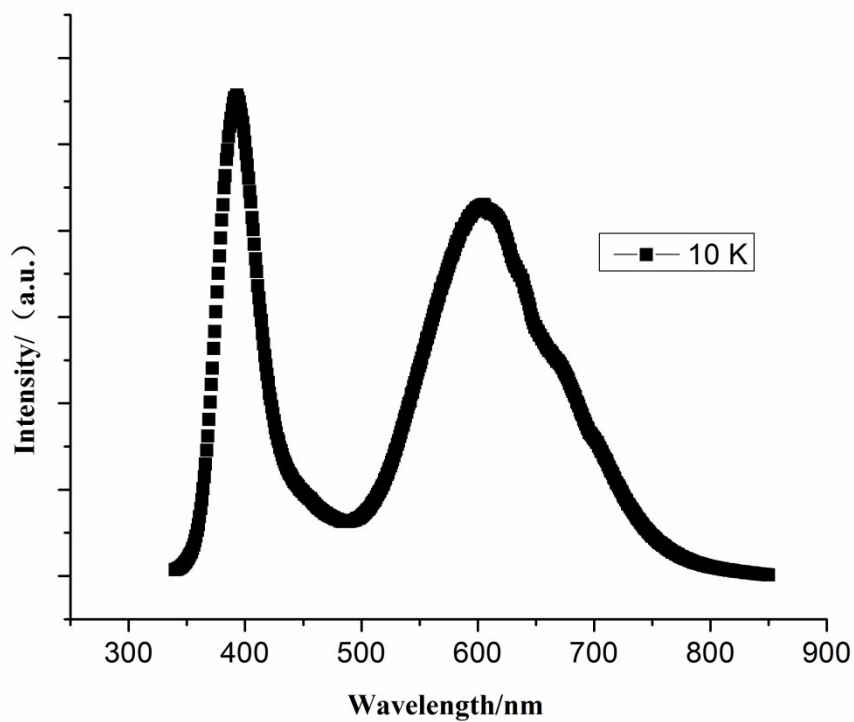

Figure S7 Solid-state emission spectra of **1** at 10 K

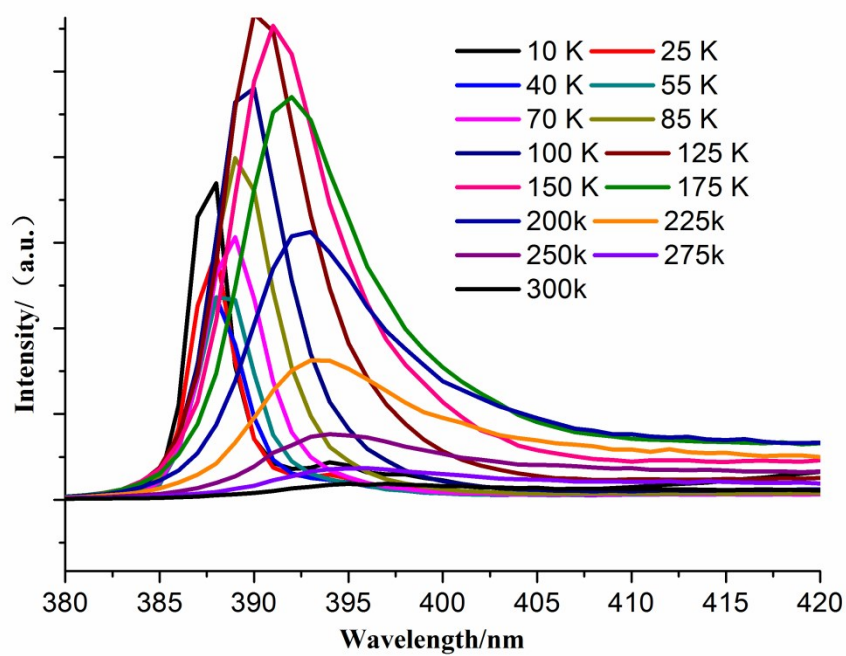

Figure S8 HE emission band of **1** from 10 to 300 K

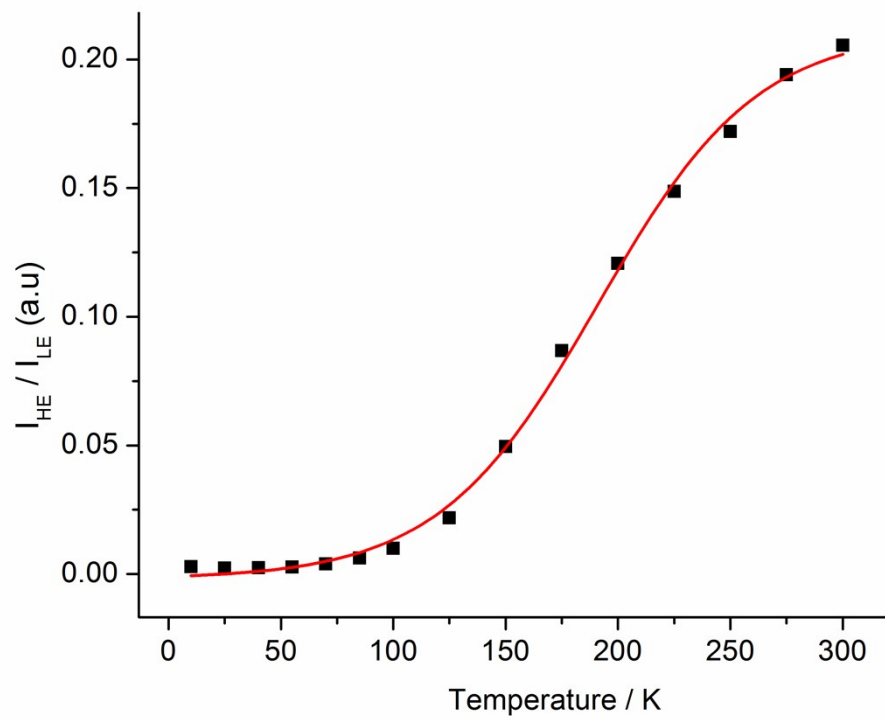

Figure S9 Temperature-dependent emission band intensity ration  $I_{HE}/I_{LE}$  and the fitted curve for 2
